# Supplementary material for: Potential source of bias in AI models: Lactate measurement in the ICU as a template
Source: Research Square preprint supplement (doi:10.21203/rs.3.rs-5836145/v1), 2025-02-06
Supplement: Supplementary file 1 [file b07e9935cdc9e0d04a78891b.docx]

## **SUPPLEMENTARY MATERIALS**

### **Supplementary Figure 1. Directed acyclic graph for outcome of a single lactate measurement on day 1 of hospital admission**

**
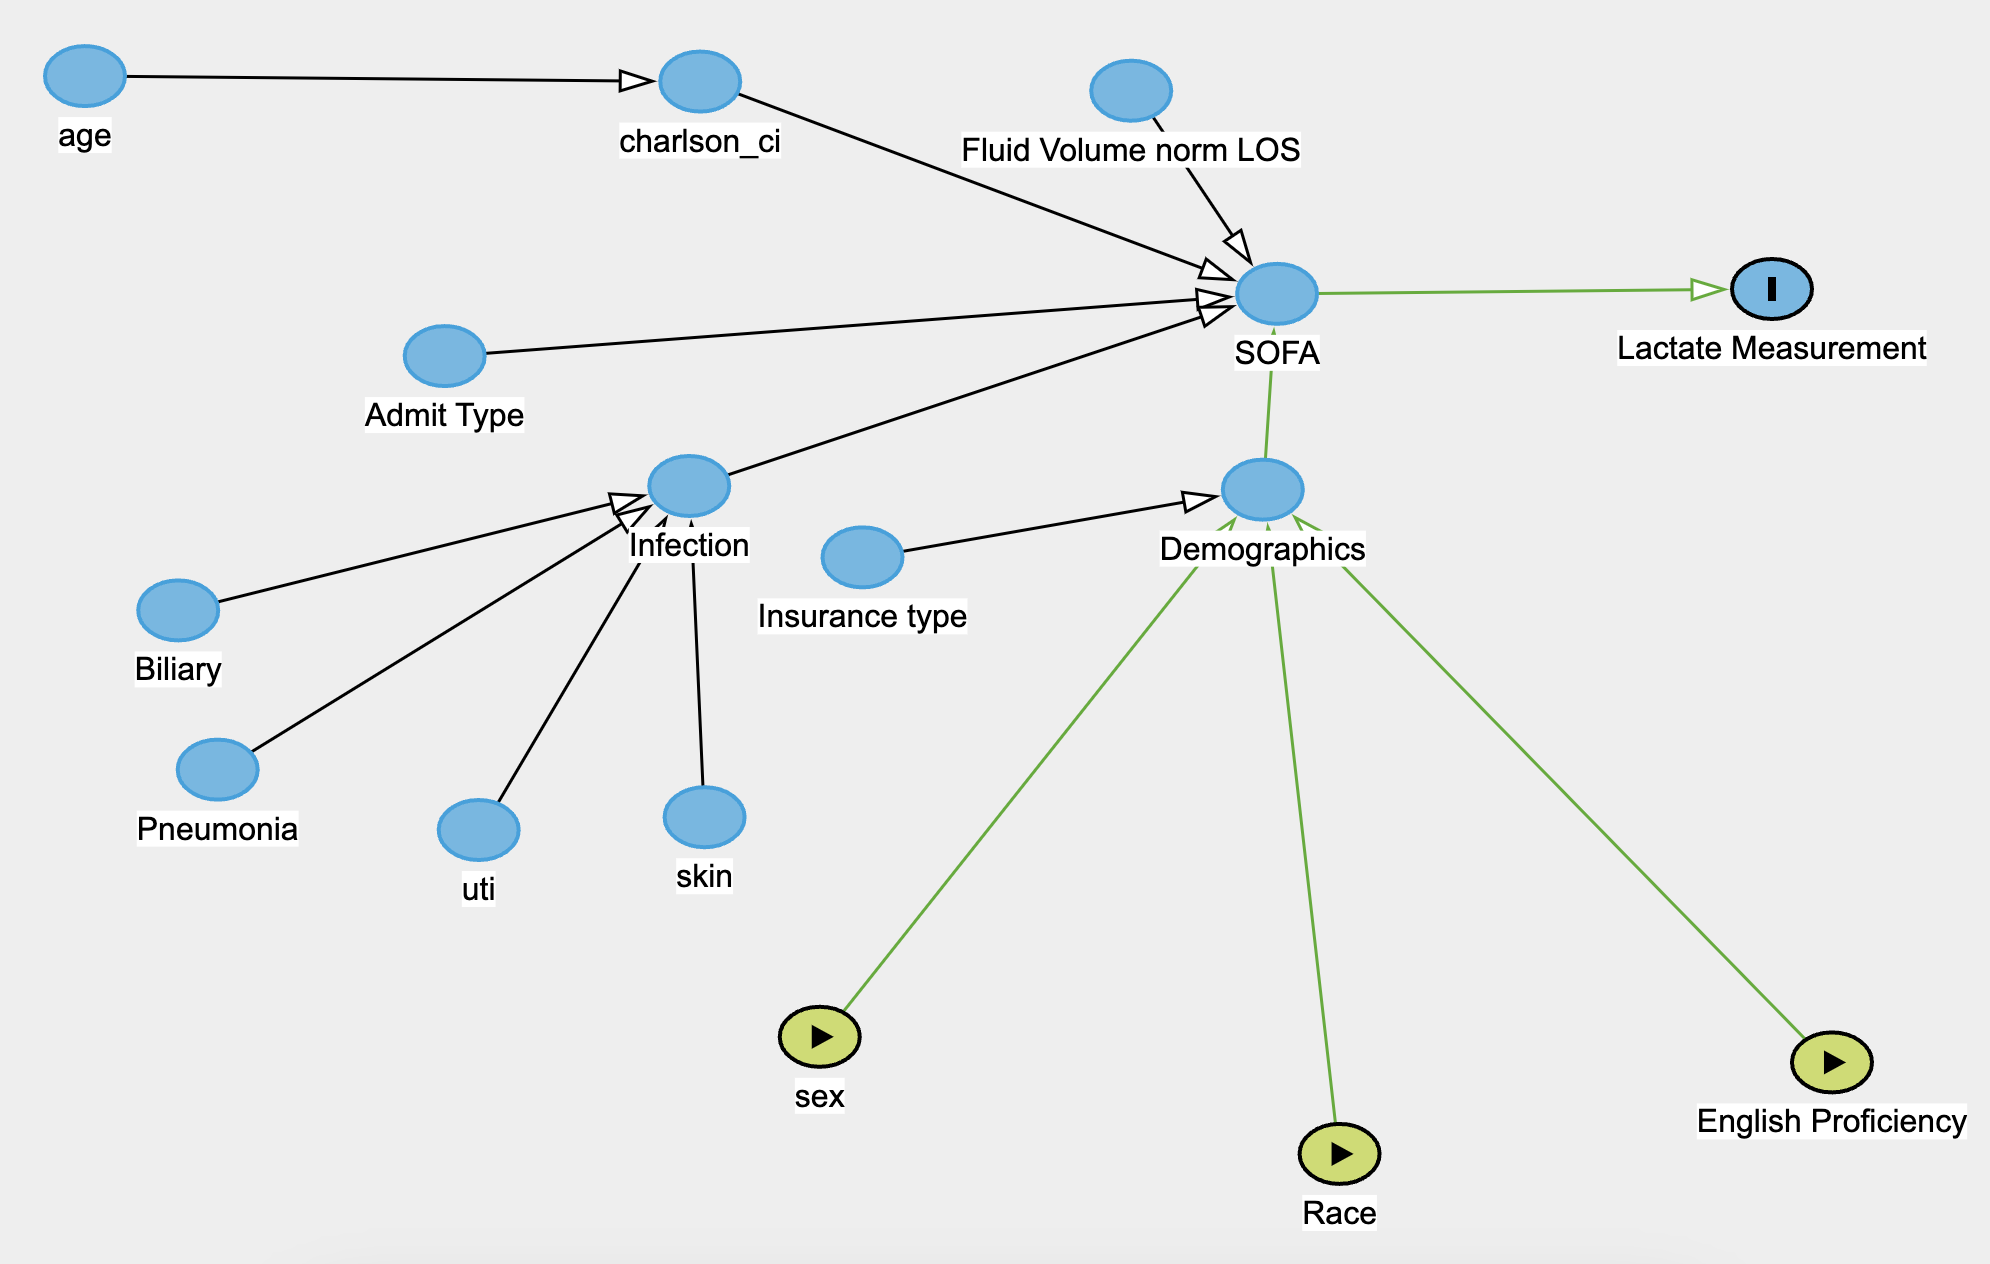
**

**Legend:** Race ethnic group includes Whites, Blacks, Hispanics, and Asians.

**Abbreviations:** charlson_ci, Charlson comorbidity score; SOFA, sequential organ failure assessment; uti, urinary tract infection; LOS, length of stay; REF, reference

### **Supplementary Table 1. Definition of considered covariates**

| **Covariates** | **Description** | **Handling of missing values** |
| --- | --- | --- |
| Sex | As provided by dataset | N/A |
| Age | At admission | N/A |
| Race Ethnicity | Grouped into Asian, Black, White, Hispanic, and Other | Exclusion of group “Other” |
| Insurance | As provided by dataset, Medicare/Medicaid or other | N/A |
| English Proficiency | As provided by dataset, English or limited | N/A |
| Year Group | As provided by dataset, bi-yearly bins | N/A |
| Elective Admission | As provided by dataset, true or false if admission is elective | N/A |
| Charlson comorbidity Index | As provided by dataset | N/A |
| Fluid Volume Normalized by Length of Stay | As provided by dataset | Mean Imputation |
| SOFA | SOFA score with each of its  subcomponents: on admission and for the selected 24 hours, aggregated by the maximum value | Assumption of best possible value in case of missing |
| Source of infection | ICD-10 codes J09.X, J1.X, J85.X, J86.X, N300.X, N390.X, K81.X, K830.X, K851.X, L0.X | Zero Imputation |
| Lactate | MIMIC-IV Item IDs 50813, 52442, 53154 | Assume no lactate measurement if no entries. |

**Legend:** X denotes a wild card character

**Abbreviations:** SOFA, sequential organ failure assessment

**Supplementary Table 2. Likelihood of receiving a lactate measurement on day 1 fitted by a Logistic regression model**

| **Demographic** | **OR** | **2.50% CI** | **97.5% CI** |
| --- | --- | --- | --- |
| *White* | *Reference* | | |
| Black | 1.11 | 1.09 | 1.13 |
| Asian | 0.95 | 0.89 | 0.99 |
| Hispanic | 0.9 | 0.84 | 0.97 |
| *Male Sex* | *Reference* | | |
| Female Sex | 0.99 | 0.97 | 0.99 |
| *English proficient* | *Reference* | | |
| English non-proficient | 1.00 | 1.00 | 1.00 |

**Abbreviations:** OR, odds ratio; CI, confidence interval
